# Supplementary material for: Electron beam irradiation cross-linked PP/LDPE blends with triple-shape memory capabilities
Source: Royal Society of Chemistry journal article supplement (doi:10.1039/d4tc01140f), 2024-01-01
Supplement: d4tc01140f1.pdf [file d4tc01140f1.pdf]

## Electron beam irradiation cross-linked PP/LDPE blends with triple-shape memory capabilities

Xiang Shi <sup>a,\*</sup>, Chao Fu <sup>b</sup>

<sup>a</sup> Center for Advanced Material Diagnostic Technology, Shenzhen Technology University,  
5 518118 Shenzhen, P. R. China

<sup>b</sup> School of Materials Science and Engineering, Hubei University of Automotive Technology,  
442002, Shiyan, P.R. China

### Supporting Information

10

**Table S1** Characteristics of polyolefin raw materials

| Sample name           | LDPE         | PP         |
|-----------------------|--------------|------------|
| Product code          | 2426H        | K7726      |
| Density (g/mL)        | 0.923        | 0.900      |
| Melt flow index (MFI) | 1.9 g/10 min | 24g/10 min |

**Table S2** The effect of irradiation doses on PP/LDPE (50/50) blends

| Irradiation doses<br>(kGy) | 0 | 15       | 25       | 50       | 75       | 100      |
|----------------------------|---|----------|----------|----------|----------|----------|
| Gel fraction (%)           | - | 21.5±1.0 | 37.9±0.9 | 59.5±0.6 | 81.9±1.4 | 94.3±2.3 |

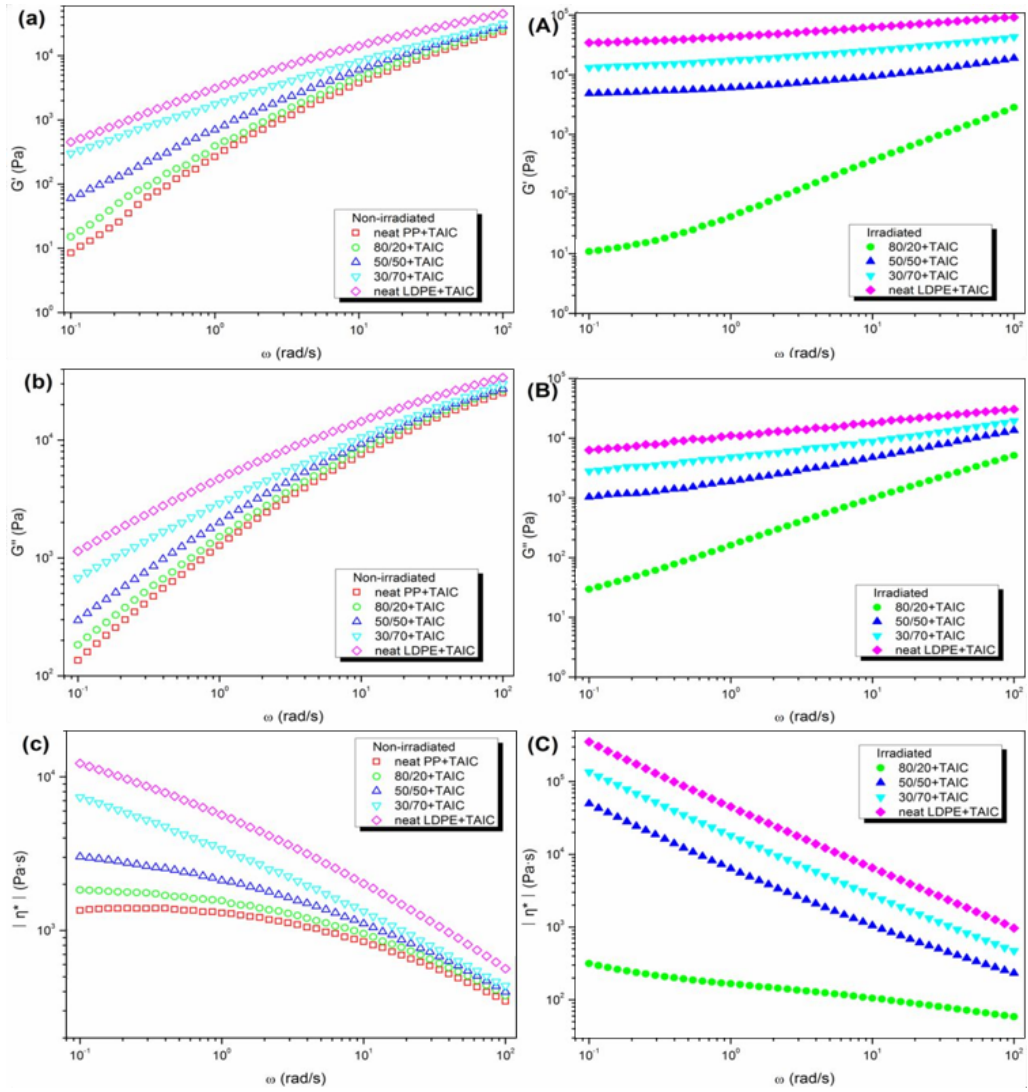

15

Fig. S1 Rheological properties of (a,b,c) non-irradiated and (A,B,C) irradiated PP/LDPE blends.

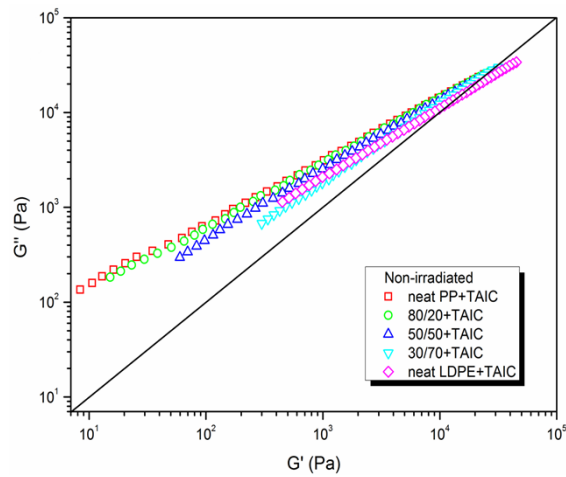

Fig. S2 Han plots of non-irradiated PP/LDPE blends
